# Supplementary material for: X-ray Photoelectron Spectroscopy (XPS) Analysis of Nitrogen Environment in Small Extracellular Vesicle Membranes: A Potential Novel Technique with Application for Cancer Screening
Source: MDPI journal article supplement (doi:10.3390/cancers15092479), 2023-04-26
Supplement: s1 [file s1]

**Table S1.** Atomic percentage of EVs isolated from cell cultures. Mean±SD.

|                        | Abundance (%) |             |              |             |             |
|------------------------|---------------|-------------|--------------|-------------|-------------|
|                        | O 1s          | N 1s        | C 1s         | S 2p        | P 2p        |
| hpMSCs <sup>EVs</sup>  | 16.56 ± 3.78  | 3.57 ± 0.22 | 78.64 ± 4.14 | 0.02 ± 0.03 | 1.19 ± 0.18 |
| NIH-3T3 <sup>EVs</sup> | 18.50 ± 0.78  | 6.70 ± 0.18 | 74.26 ± 0.88 | 0           | 0.53 ± 0.04 |
| B16-F1 <sup>EVs</sup>  | 18.05 ± 5.77  | 5.37 ± 0.69 | 75.67 ± 5.51 | 0.10 ± 0.12 | 0.79 ± 0.25 |
| B16-F10 <sup>EVs</sup> | 20.18 ± 7.55  | 4.95 ± 1.18 | 73.99 ± 7.27 | 0.07 ± 0.12 | 0.80 ± 0.30 |

**Table S2.** Nitrogen chemical environmental analysis of EVs isolated from cell cultures. Mean±SD.

|                        | Abundance (%) |              |       |              |
|------------------------|---------------|--------------|-------|--------------|
|                        | Pyridine type | -NH2         | R2-NH | R3-N         |
| hpMSCs <sup>EVs</sup>  | 0.31 ± 0.7    | 75.14 ± 2.50 |       | 24.22 ± 2.75 |
| NIH-3T3 <sup>EVs</sup> | 0.71 ± 1.38   | 89.98 ± 2.41 |       | 9.93 ± 1.31  |
| B16-F1 <sup>EVs</sup>  | 0.46 ± 0.64   | 89.07 ± 2.76 |       | 10.47 ± 2.72 |
| B16-F10 <sup>EVs</sup> | 0.43 ± 0.73   | 83.97 ± 8.04 |       | 15.59 ± 8.29 |

**Table S3.** Percentage atomic composition of EVs isolated from female control donors (n=6) and ovarian-tumour patients of different tumour grades: I (n=8), II (n=1), III (n=2) and IV (n=7). Mean±SD.

|           | Abundance (%) |             |              |             |
|-----------|---------------|-------------|--------------|-------------|
|           | O 1s          | N 1s        | C 1s         | P 2p        |
| Healthy   | 16.13 ± 0.68  | 6.06 ± 1.08 | 76.61 ± 1.15 | 1.21 ± 0.22 |
| Grade I   | 16.17 ± 1.80  | 6.21 ± 1.04 | 76.56 ± 1.58 | 1.07 ± 0.29 |
| Grade II  | 17.43 ± 0     | 5.37 ± 0    | 75.84 ± 0    | 1.36 ± 0    |
| Grade III | 16.82 ± 2.60  | 7.21 ± 0.86 | 74.82 ± 2.57 | 1.16 ± 0.83 |
| Grade IV  | 18.35 ± 3.88  | 6.63 ± 1.5  | 73.84 ± 4.25 | 1.18 ± 0.52 |

**Table S4.** Nitrogen composition of EVs isolated from female control donors (n=6) and ovarian-tumour patients of different tumour grades: I (n=8), II (n=1), III (n=2) and IV (n=7). Mean±SD.

|           | Abundance (%)         |               |             |              |
|-----------|-----------------------|---------------|-------------|--------------|
|           | Pyridine type bonding | -NH2          | R2-NH       | R3-N         |
| Healthy   | 14.50 ± 15.31         | 68.00 ± 17.97 | 6.17 ± 5.34 | 10.83 ± 7.36 |
| Grade I   | 0.71 ± 0.95           | 85.86 ± 2.61  | 7.29 ± 3.99 | 6.14 ± 5.34  |
| Grade II  | 0.00 ± 0.00           | 89.00 ± 0.00  | 5.00 ± 0.00 | 6.00 ± 0.00  |
| Grade III | 0.00 ± 0.00           | 88.00 ± 2.83  | 7.50 ± 0.71 | 4.50 ± 2.12  |
| Grade IV  | 0.00 ± 0.00           | 86.50 ± 3.02  | 7.50 ± 4.23 | 6.00 ± 3.95  |

**Table S5.** Atomic composition of EVs isolated from healthy donors (n=10) and pancreatic tumour patients (n=10) at diagnosis. Mean±SD.

|                   | <b>Abundance (%)</b> |             |              |             |
|-------------------|----------------------|-------------|--------------|-------------|
|                   | <b>O 1s</b>          | <b>N 1s</b> | <b>C 1s</b>  | <b>P 2p</b> |
| Healthy           | 15.86 ± 0.77         | 6.54 ± 1.20 | 76.53 ± 0.95 | 1.07 ± 0.27 |
| Pancreatic tumour | 16.97 ± 1.89         | 7.13 ± 1.25 | 74.80 ± 2.59 | 1.09 ± 0.32 |

**Table S6.** Nitrogen composition of EVs isolated from healthy donors (n=10) and pancreatic tumour patients (n=10) at diagnosis. Mean±SD.

|                   | <b>Abundance (%)</b>          |               |               |             |
|-------------------|-------------------------------|---------------|---------------|-------------|
|                   | <b>Pyridine type bounding</b> | <b>-NH2</b>   | <b>R2-NH</b>  | <b>R3-N</b> |
| Healthy           | 9.52 ± 13.11                  | 76.55 ± 17.27 | 4.11 ± 4.93   | 9.82 ± 5.88 |
| Pancreatic tumour | 3.31 ± 5.91                   | 71.79 ± 17.24 | 19.16 ± 11.66 | 5.74 ± 6.89 |
